# Supplementary material
Source: HighWire-hosted journal article supplement (https://cmaj.ca/highwire/filestream/59001/field_highwire_adjunct_files/0/186_10.pdf)
Supplement: 186_10.pdf [file 186_10.pdf]

## ÉDITORIAL

## L'épuisement professionnel des médecins : qui nous protégera contre nous-mêmes?

Michael Fralick MD, Ken Flegel MDCM MSc

Pour la version anglaise de l'éditorial, veuillez consulter la page 731.

Voir l'analyse connexe en anglais à la page 761 et à [www.cmaj.ca/lookup/doi/10.1503/cmaj.131053](http://www.cmaj.ca/lookup/doi/10.1503/cmaj.131053)

Quand la journée de travail se termine chez Volkswagen, les employés n'ont plus accès au courrier électronique de l'entreprise. Atos, une firme de technologie de l'information comptant plus de 80 000 employés, va plus loin en supprimant son système de courrier électronique. La Banque de Montréal, emboîtant le pas à Goldman Sachs Group Inc., insiste pour que ses banquiers subalternes soient en congé le week-end. Les entreprises constatent que la disponibilité constante des employés a une conséquence inattendue : l'épuisement professionnel. L'absentéisme, la baisse de productivité et le fort taux de roulement du personnel qui en découlent obligent les dirigeants à reconnaître cette réalité.

L'épuisement professionnel, qui a été décrit pour la première fois en 1974 par le psychologue américain Herbert Freudenberger, n'est pas un trouble reconnu dans le *Manuel diagnostique et statistique des troubles mentaux*. Cependant, selon la Classification internationale des maladies (CIM-10) de l'Organisation mondiale de la Santé, l'épuisement professionnel est un « état d'épuisement vital ». Le Maslach Burnout Inventory<sup>1</sup>, qui est considéré comme étant la norme dans les études sur la prévalence de l'épuisement professionnel chez les médecins, présente trois dimensions de cet état : l'épuisement affectif dû à une charge de travail écrasante, la dépersonnalisation (relations impersonnelles avec les patients ou les collègues) et l'impression de ne pas se réaliser. Les symptômes de l'épuisement professionnel peuvent être physiques (p. ex., insomnie, fatigue, maux de tête, troubles gastro-intestinaux) et psychologiques (p. ex., irritabilité, cynisme, manque de concentration).

Comme c'est le cas pour de nombreuses affections courantes, la voie vers l'épuisement professionnel est tracée des années avant que les symptômes ne se manifestent. Nombre d'entre nous sommes entrés à l'école de médecine comme des perfectionnistes qui n'avaient pas peur de l'abnégation de soi. Nous savions que notre réussite dépendait de nos bonnes notes et des longues heures passées à l'hôpital. Nous sommes ensuite devenus médecins résidents. Le taux estimé de prévalence de l'épuisement professionnel chez les résidents, peu importe leur année de formation, peut atteindre 50 %<sup>2</sup>. On pourrait croire que les longues heures de travail sont la principale

cause de l'épuisement professionnel chez les résidents. Cependant, dans un article sur le sujet paru dans le *JAMC*, Pattani et ses collaborateurs<sup>3</sup> précisent que le quart de travail maximal permis au Canada, à quelques exceptions près, est de 26 heures. Aux États-Unis, en Europe et en Nouvelle-Zélande, il est d'environ 16 heures. Aucune preuve n'indique toutefois que la réduction des heures de travail améliore la qualité de vie, et certaines études démontrent qu'une réduction des heures de travail entraîne une baisse de la qualité de vie<sup>4,5</sup>. À elle seule, la réduction des heures de travail ne permettra pas de prévenir l'épuisement professionnel chez les résidents et d'améliorer leur qualité de vie.

La résidence dure quelques années, mais une carrière de médecin dure toute une vie. Deux tiers des médecins canadiens ont une charge de travail qu'ils jugent trop lourde<sup>6</sup>. Bien qu'il soit courant de se sentir épuisé, cela n'est pas normal et risque de nuire à la pratique médicale. Nous avons rarement l'occasion de couper les courriels, les messages texte, les téléphones et les téléavertisseurs. Une fois la journée clinique terminée, les engagements administratifs, les responsabilités d'enseignement et les projets de recherche accaparent notre attention. Faut-il se demander pourquoi certaines entreprises ont tout simplement choisi de fermer leur système de courrier électronique à la fin de la journée de travail?

L'épuisement professionnel n'est ni bénin, ni temporaire. Il peut entraîner de l'anxiété, une dépression, des problèmes de drogue ou d'alcool, une dépendance et, dans de rares cas, pousser au suicide<sup>7</sup>. Les conséquences de l'épuisement professionnel ne se limitent pas aux médecins. Plus de la moitié des médecins canadiens estiment que leur vie familiale et personnelle souffre en raison des exigences de leur profession<sup>6</sup>.

L'épuisement professionnel des médecins peut aussi avoir des répercussions sur les soins aux patients<sup>7</sup>. Un sondage a révélé que plus de 50 % des médecins pensent que la fatigue, l'épuisement ou le manque de sommeil ont des conséquences négatives sur les soins prodigués<sup>7</sup>. Les médecins ont l'obligation professionnelle d'être en bonne santé afin de pratiquer une bonne médecine. Il faut avoir les idées claires pour poser les bons diagnostics et prendre les décisions thérapeutiques appropriées, qui sont des éléments fondamentaux du rôle de tout médecin.

Il n'existe pas d'approches éprouvées de la gestion de l'épuisement professionnel. On a généralement recours au temps libre loin du travail et à des techniques de modification du comportement. De petits essais d'observation aléatoires ont produit des résultats encourageants, indiquant que la pleine conscience et la méditation peuvent aider à prévenir et à gérer l'épuisement professionnel<sup>2</sup>.

Comme nous connaissons les causes de l'épuisement professionnel, nous devrions axer nos efforts sur la prévention. Les recommandations fondées sur le bon sens peuvent s'avérer efficaces : prendre soin de soi (faire de l'exercice, manger sainement, pratiquer la méditation); partir régulièrement en vacances; couper l'accès aux courriels; savoir comment et quand dire non; se fixer soi-même des limites, sans attendre que les autres le fassent à notre place; apprendre à reconnaître les symptômes de l'épuisement professionnel et savoir demander de l'aide.<sup>2,6</sup> Le site Web de l'Association médicale canadienne offre un certain nombre de ressources utiles

([www.cma.ca/vie/programmesprovinciauxsantémédecins](http://www.cma.ca/vie/programmesprovinciauxsantémédecins)). De plus, il existe des cours de formation continue à l'intention de ceux qui aimeraient en savoir plus sur les techniques de méditation et de pleine conscience.

Le moment est peut-être venu de tirer une leçon du monde des affaires. Les médecins doivent élaborer des stratégies efficaces qui encouragent l'équilibre travail-vie personnelle et permettent de prévenir l'épuisement professionnel. Si nous ne le faisons pas, nous allons en souffrir. Tout comme nos patients.

Références, se rendre à [www.cmaj.ca/lookup/suppl/doi:10.1503/cmaj.140588/-/DC1](http://www.cmaj.ca/lookup/suppl/doi:10.1503/cmaj.140588/-/DC1)

**Intérêts concurrents :** Aucun déclaré pour Michael Fralick. Pour Ken Flegel, se rendre à [www.cmaj.ca/site/misc/cmaj\\_staff.xhtml](http://www.cmaj.ca/site/misc/cmaj_staff.xhtml).

**Affiliations :** Michael Fralick est résident en médecine interne à l'Université de Toronto. Ken Flegel est rédacteur adjoint senior.

**Correspondance à :** Éditeur du JAMC, [pubs@cmaj.ca](mailto:pubs@cmaj.ca)

## RÉSUMÉS DE RECHERCHE

# Grossesse et risque d'accident de la route

Donald A. Redelmeier MD MSHSR, Sharon C. May BSc, Deva Thiruchelvam MSc, Jon F. Barrett MD

Pour la version anglaise de ce résumé, veuillez consulter la page 742.

**Contexte :** La grossesse entraîne divers changements physiologiques et de style de vie qui peuvent contribuer à une fréquence accrue de la conduite chez les femmes et à leur exposition accrue à une erreur de conduite. Nous avons comparé le risque d'accident de la route grave durant le deuxième trimestre de grossesse au risque de base avant la grossesse.

**Méthodes :** Nous avons procédé à une analyse de cohorte longitudinale basée dans la population et auto-appariée regroupant des femmes ayant accouché en Ontario entre le 1<sup>er</sup> avril 2006 et le 31 mars 2011. Nous avons exclus les femmes de moins de 18 ans, celles qui vivaient à l'extérieur de l'Ontario, celles qui ne disposaient pas d'un numéro de carte d'assurance maladie valide en vertu du régime d'assurance universel et celles qui étaient sous les soins d'une sage-femme. Le paramètre principal était tout accident de la route ayant nécessité une consultation à l'urgence.

**Résultats :** En tout, 507 262 femmes ont accouché durant la période de l'étude. Chez ces

femmes, on a dénombré 6922 accidents de la route alors qu'elles étaient au volant au cours de l'intervalle de départ de 3 ans (177 par mois) et 757 durant le second trimestre de grossesse (252 par mois), équivalant à une augmentation relative de 42 % (intervalle de confiance de 95 % 32–53 %,  $p < 0,001$ ). L'accroissement du risque s'étendait à diverses populations, à divers cas obstétricaux et à diverses caractéristiques de collisions. Le risque le plus grand s'observait au début du second trimestre et était contrebalancé par celui du troisième trimestre. Aucune augmentation similaire n'a été observée dans les cas de collisions où les femmes étaient passagères ou piétonnes, ou dans les cas de blessures intentionnelles, de chutes accidentelles ou de comportements à risque auto-déclarés.

**Interprétation :** La grossesse est associée à un risque substantiel d'accident de la route grave durant le second trimestre. Ce risque mérite que l'on en tienne compte dans le cadre des soins prénataux.

**Intérêts concurrents :** Aucun déclaré.

Cet article a été revu par les pairs.

**Correspondance à :** Donald A. Redelmeier, [dar@ices.on.ca](mailto:dar@ices.on.ca)

**Avertissement :** Cette étude a bénéficié du soutien de l'*Institute for Clinical Evaluative Sciences* (ICES), lui-même soutenu par une subvention annuelle du ministère de la Santé et des Soins de longue durée de l'Ontario. Les opinions, résultats et conclusions présentés dans cet article n'engagent que les auteurs et sont indépendants des sources de financement. L'aval de l'ICES ou du ministère de la Santé et des Soins de longue durée de l'Ontario n'est pas sous-entendu et ne doit pas être supposé.
